# Supplementary material
Source: publisher site journal article supplement (https://www.dovepress.com/article/300328)

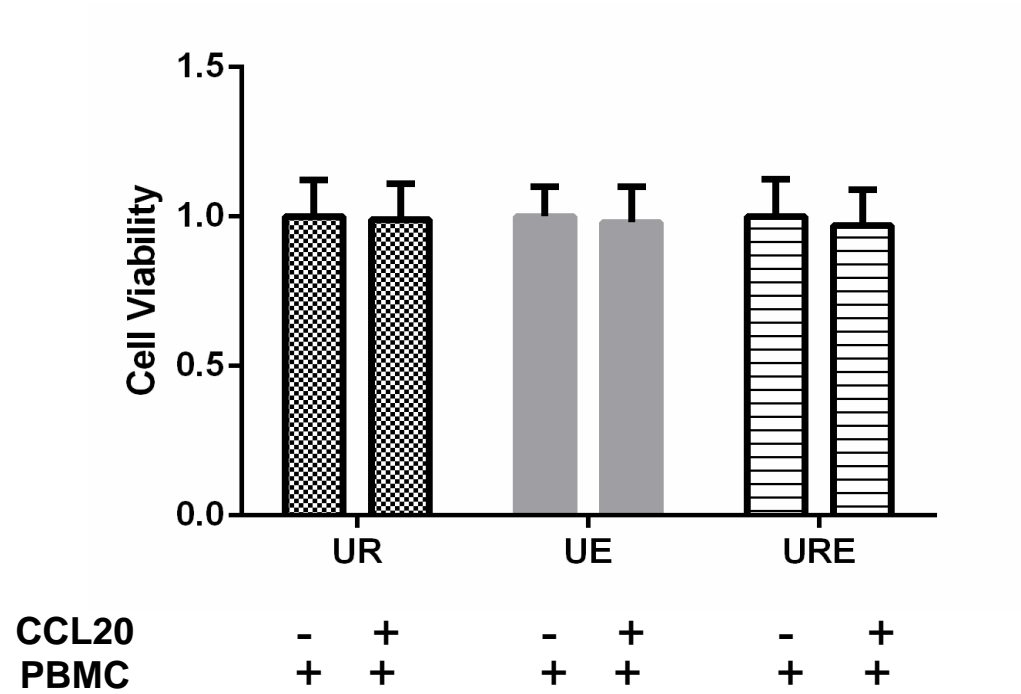

**Supplement Figure 1.** Cell viability of UR, UE, URE cells treated with CCL20 and PBMC.

Supplement: Supplementary file 1 [file get_supplementary_file.php]
